# Supplementary material
Source: Springer Nature journal article supplement (https://www.springermedizin.de/resource/supplementary/12943_2009_690_MOESM14_ESM.pdf/9554586)

**A**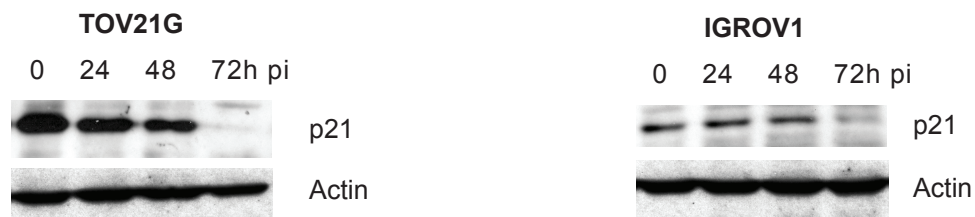**B**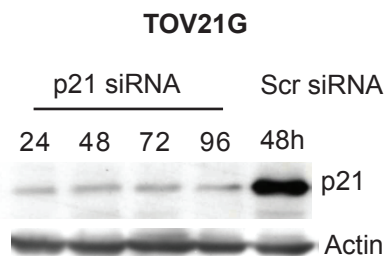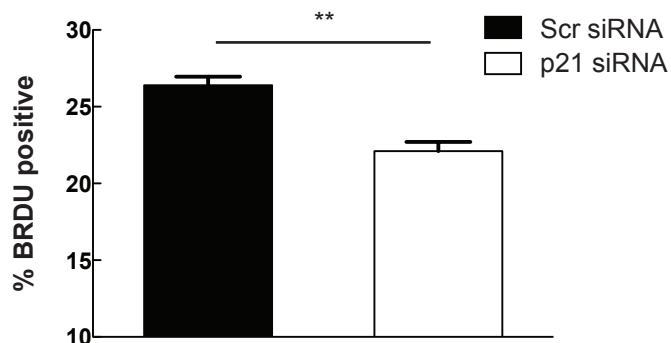**C**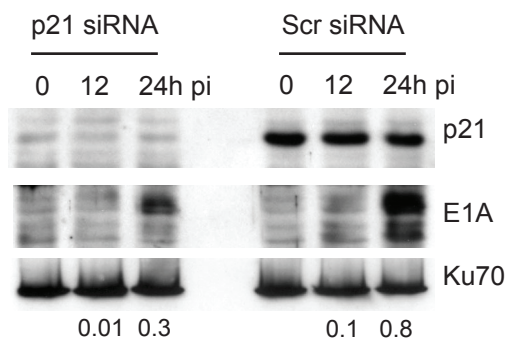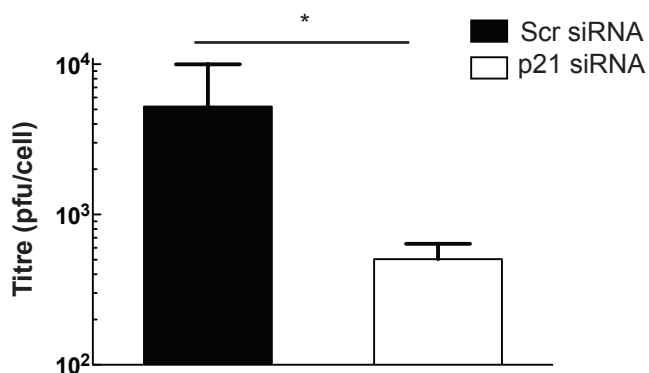**D**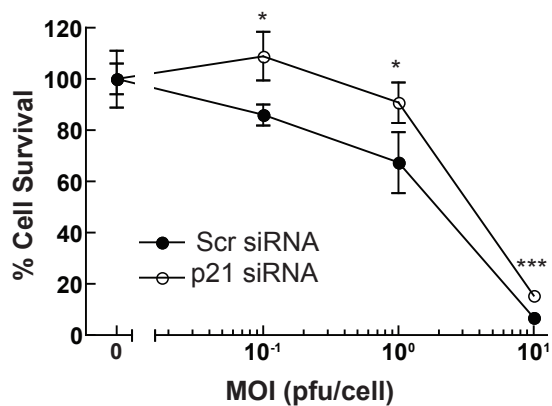

Supplement: MOESM14 [file 9554586]
